# Supplementary material
Source: PubMed Central journal article supplement (PMC5381723)
Supplement: NIHMS852175-supplement-suppl.pdf [file NIHMS852175-supplement-suppl.pdf]

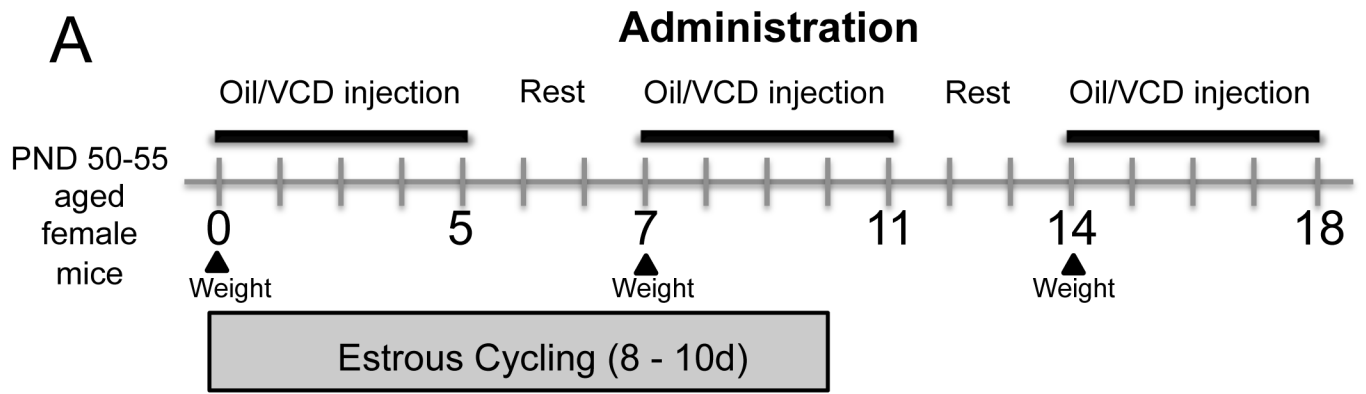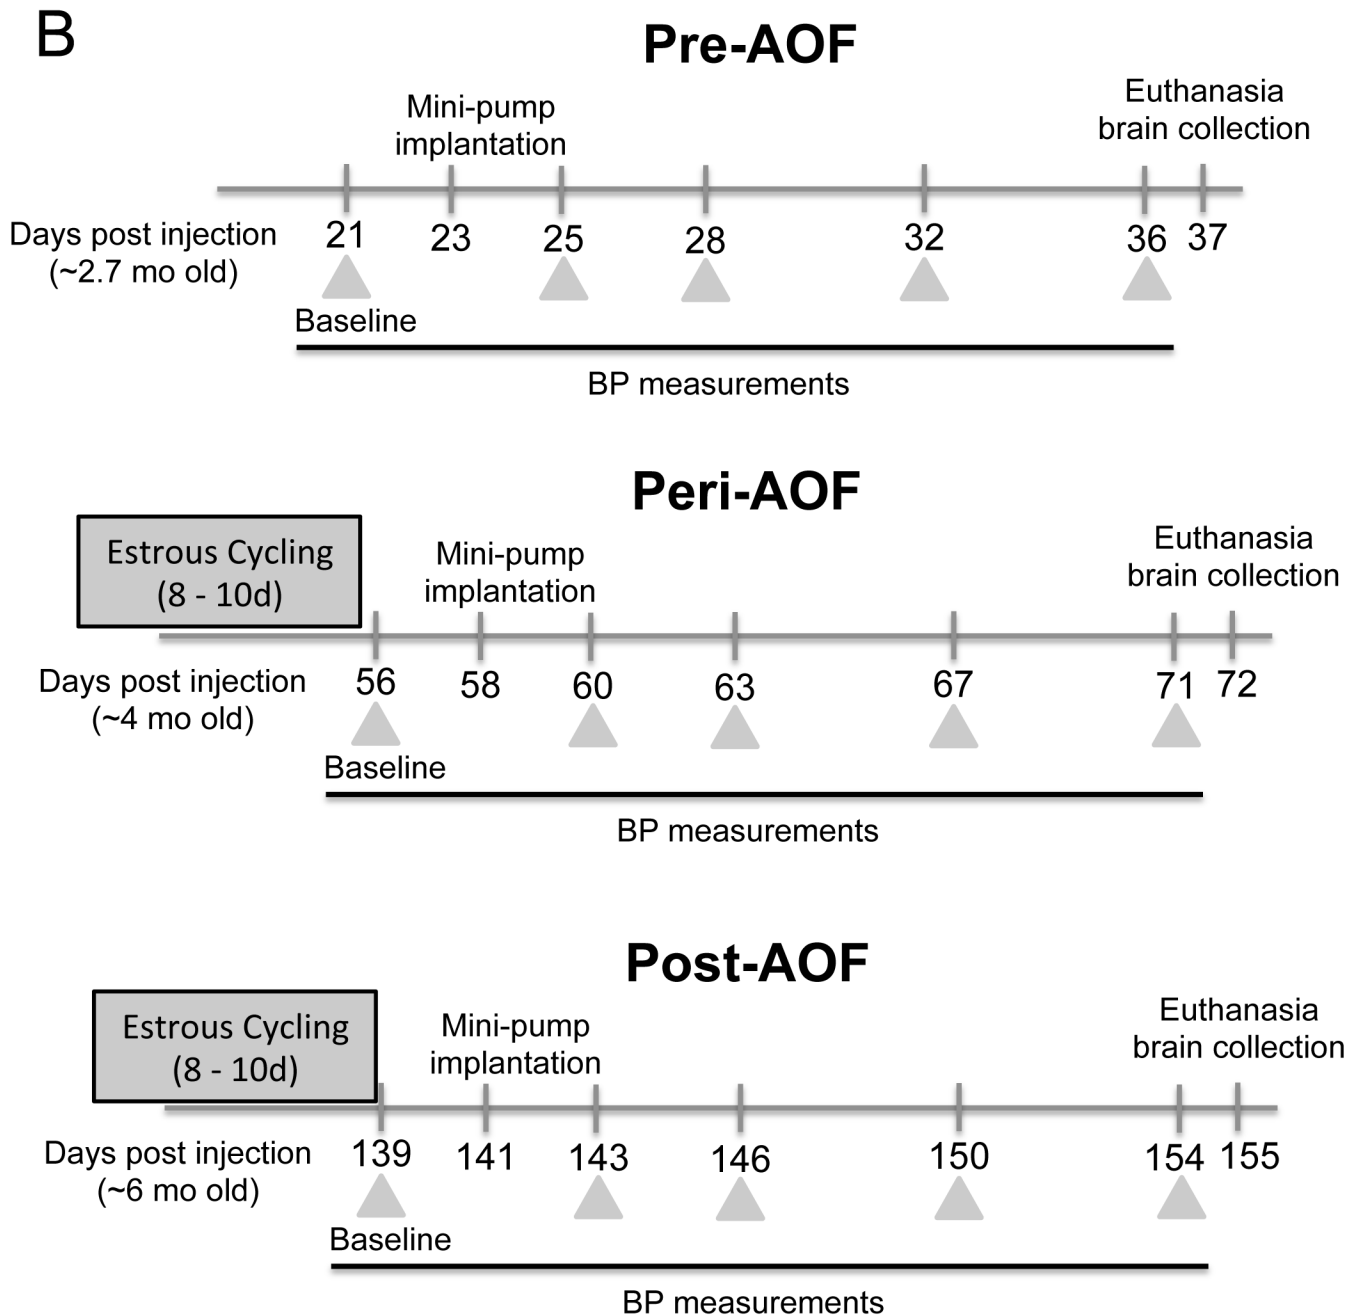

**Suppl. fig. 1.** Schematic of the experimental timeline. **A.** Mice (aged P50--55) were injected (I.P) with either VCD (130 mg/kg) or oil for 15 days. Mice were weighed at the beginning of each week. **B.** At pre-, peri- and post-AOF timepoints mice were implanted with osmotic minipumps containing AngII (delivered at rate of 600 ng/kg/min) or saline. Estrous cycles were assessed using vaginal smear cytology 8--10 days prior to implanting osmotic minipumps. Blood pressure was assessed using tail-cuff plethmography 1 day prior to mini-pump implantation (baseline) and every 3--4 days after minipump implantations. Mice were euthanized 14 days following minipump implantations and their brains were collected for electron microscopic or ROS experiments.

**Suppl. fig. 1. Schematic of the experimental timeline.** **A.** Mice (aged P50-55) were injected (I.P) with either VCD (130 mg/kg) or oil for 15 days. Mice were weighed at the beginning of each week. **B.** At pre-, peri- and post-AOF timepoints mice were implanted with osmotic minipumps containing AngII (delivered at rate of 600 ng/kg/min) or saline. Estrous cycles were assessed using vaginal smear cytology 8-10 days prior to implanting osmotic minipumps. Blood pressure was assessed using tail-cuff plethmography 1 day prior to minipump implantation (baseline) and every 3-4 days after minipump implantations. Mice were euthanized 14 days following minipump implantations and their brains were collected for electron microscopic or ROS experiments.

Suppl. table 3. Systolic Blood Pressure measurements from AOF mice

| Group            | N | Pre-implant | Post implant<br>2 days | Post-implant<br>5 days | Post implant<br>9 days |
|------------------|---|-------------|------------------------|------------------------|------------------------|
| <b>Pre-AOF:</b>  |   |             |                        |                        |                        |
| Oil-saline       | 9 | 107.0 ± 5.0 | 109.4 ± 5.0            | 112.0 ± 5.3            | 106.7 ± 6.8            |
| Oil-AngII        | 7 | 109.3 ± 2.4 | 121.0 ± 6.1            | 111.3 ± 7.3            | 110.0 ± 3.7            |
| VCD-saline       | 5 | 105.6 ± 3.2 | 107.7 ± 2.4            | 110.7 ± 8.4            | 112.5 ± 4.2            |
| VCD-AngII        | 8 | 111.2 ± 2.7 | 111.4 ± 5.4            | 109.2 ± 4.4            | 107.6 ± 4.8            |
| <b>Peri-AOF:</b> |   |             |                        |                        |                        |
| Oil-saline       | 6 | 103.0 ± 4.6 | 103.2 ± 5.2            | 103.4 ± 5.5            | 104.6 ± 5.8            |
| Oil-AngII        | 4 | 110.6 ± 8.8 | 109.4 ± 8.0            | 108.8 ± 6.8            | 119.8 ± 9.6            |
| VCD-saline       | 4 | 114.7 ± 2.9 | 116.8 ± 5.8            | 105.0 ± 12.5           | 107.9 ± 4.0            |
| VCD-AngII        | 5 | 113.5 ± 2.5 | 114.4 ± 7.0            | 115.0 ± 2.8            | 121.6 ± 3.8            |
| <b>Post-AOF:</b> |   |             |                        |                        |                        |
| Oil-saline       | 6 | 107.4 ± 5.9 | 108.2 ± 6.2            | 112.1 ± 5.5            | 109.7 ± 7.6            |
| Oil-AngII        | 9 | 107.5 ± 3.5 | 116.3 ± 4.5            | 112.1 ± 4.8            | 116.9 ± 6.8            |
| VCD-saline       | 8 | 104.5 ± 5.6 | 104.1 ± 3.1            | 105.9 ± 5.6            | 112.8 ± 6.1            |
| VCD-AngII        | 7 | 108.7 ± 4.9 | 116.0 ± 4.2            | 111.0 ± 7.8            | 120.0 ± 7.8            |

**Suppl. table 2. Estrous Cycle Stages for mice not used for EM experiments**

**PRE AOF TIMEPOINT (~2.7 months old) \***

**Oil – Injected (Control)**

| Animal # | Estrous cycle stage 8-10 days prior to pump implant |    |    |   |   |   |    |    |   |    | Pump contents | terminal estrous stage |
|----------|-----------------------------------------------------|----|----|---|---|---|----|----|---|----|---------------|------------------------|
|          | 1                                                   | 2  | 3  | 4 | 5 | 6 | 7  | 8  | 9 | 10 |               |                        |
| 62-1     | M                                                   | D  | E  |   | M | M | PE | E  | M |    | saline        | E                      |
| 62-2     | M                                                   | M  | PE |   | M | M | M  | E  | M |    | saline        | E                      |
| 62-3     | E                                                   | PE | E  |   | M | M | M  | M  | M |    | saline        | MD                     |
| 70-2     |                                                     |    |    |   |   |   |    |    |   |    | saline        |                        |
| 64-1     | E                                                   | E  | EM |   | M | M | PE | PE | M |    | AngII         | MD                     |
| 64-2     | M                                                   | DE | M  |   | M | M | PE | PE | E |    | AngII         | PE                     |
| 64-3     | M                                                   | M  | P  |   | E | M | M  | PE | E |    | AngII         | E                      |

**VCD - Injected**

| Animal # | Estrous cycle stage 8-10 days prior to pump implant |    |    |    |    |    |    |    |   |    | Pump contents | terminal estrous stage |
|----------|-----------------------------------------------------|----|----|----|----|----|----|----|---|----|---------------|------------------------|
|          | 1                                                   | 2  | 3  | 4  | 5  | 6  | 7  | 8  | 9 | 10 |               |                        |
| 61-1     | PE                                                  | E  | E  |    | M  | D  | PE | E  | M |    | saline        | MD                     |
| 61-3     | E                                                   | M  | D  |    | E  | M  | M  | MD | M |    | saline        | E                      |
| 61-2     | E                                                   | M  | M  |    | M  | M  | M  | M  | D |    | AngII         | E                      |
| 68-1     | MD                                                  | MD | D  | PE | E  | MD | PE | E  |   |    | AngII         | MD                     |
| 68-2     | PE                                                  | E  | EM | MD | MD | MD | E  | E  |   |    | AngII         | E                      |
| 68-3     | PE                                                  | E  | E  | MD | MD | E  | E  | E  |   |    | AngII         |                        |

**PERI AOF TIMEPOINT (~4 months old)**

**Oil – Injected (Control)**

| Animal # | Estrous cycle stage 8-10 days prior to pump implant |    |   |    |    |   |    |    |    |    | Pump contents | terminal estrous stage |
|----------|-----------------------------------------------------|----|---|----|----|---|----|----|----|----|---------------|------------------------|
|          | 1                                                   | 2  | 3 | 4  | 5  | 6 | 7  | 8  | 9  | 10 |               |                        |
| 36-2     | M                                                   | D  | E | M  | E  | E | M  | MD |    |    | saline        | MD                     |
| 38-1     | M                                                   | M  | M | M  | PE | E | M  | M  | PE |    | saline        | E                      |
| 38-2     | M                                                   | E  | M | M  | M  | E | M  | M  | PE |    | saline        | MD                     |
| 985-5    | MD                                                  | MD | D | PE | ED | E | ED | MD | EP |    | AngII         | DP                     |

### VCD - Injected

| Animal # | Estrous cycle stage 8-10 days prior to pump implant |    |    |    |    |    |    |    |   |    | Pump contents | terminal estrous stage |
|----------|-----------------------------------------------------|----|----|----|----|----|----|----|---|----|---------------|------------------------|
|          | 1                                                   | 2  | 3  | 4  | 5  | 6  | 7  | 8  | 9 | 10 |               |                        |
| 30-1     | E                                                   | MD | MD | E  | MD | MD | MD | D  |   |    | saline        | MD                     |
| 38-4     | M                                                   | PE | E  | E  | M  | M  | PE | PE | E |    | AngII         | E                      |
| 43-2     | MD                                                  | PE | E  | MD | MD | MD | MD | PE | E | E  | AngII         | MD                     |

### POST AOF TIMEPOINT (~6 months old)

#### Oil – Injected (Control)

| Animal # | Estrous cycle stage 8-10 days prior to pump implant |    |   |    |    |   |    |    |    |    | Pump contents | terminal estrous stage |
|----------|-----------------------------------------------------|----|---|----|----|---|----|----|----|----|---------------|------------------------|
|          | 1                                                   | 2  | 3 | 4  | 5  | 6 | 7  | 8  | 9  | 10 |               |                        |
| 02-2     | MD                                                  | MD | E | EM | P  | E | E  | MD | MD |    | saline        | MD                     |
| 16-1     | M                                                   | D  | D | D  | E  | E | M  | M  | E  | M  | saline        |                        |
| 16-2     | E                                                   | M  | M | P  | E  |   | M  | PE | E  | M  | saline        |                        |
| 02-1     | MD                                                  | PE | E | MD | MD | D | DP | MD | MD |    | AngII         | MD                     |
| 32-1     | E                                                   | M  | M | M  | M  | E | E  | E  | M  | M  | AngII         | E                      |
| 33-1     | E                                                   | M  | M | PE | M  | M | PE | E  | E  |    | AngII         | E                      |
| 33-2     | EM                                                  | MD | M | PE | M  | M | M  | M  | M  |    | AngII         | MD                     |
| 33-3     | PE                                                  | E  | M | PE | MD | E | E  | M  | M  |    | AngII         | E                      |

#### VCD – Injected

| Animal # | Estrous cycle stage 8-10 days prior to pump implant |    |    |    |    |    |    |    |    |    | Pump contents | terminal estrous stage |
|----------|-----------------------------------------------------|----|----|----|----|----|----|----|----|----|---------------|------------------------|
|          | 1                                                   | 2  | 3  | 4  | 5  | 6  | 7  | 8  | 9  | 10 |               |                        |
| 02-3     | MD                                                  | MD | MD | MD | MD | E  | E  | E  | E  |    | saline        | E                      |
| 17-1     | M                                                   | M  | M  | M  | M  | M  | M  | M  | M  | M  | saline        |                        |
| 17-2     | M                                                   | M  | M  | M  | M  | M  | M  | M  | M  | E  | saline        |                        |
| 17-3     | E                                                   | M  | M  | M  | M  | M  | M  | E  | E  | M  | saline        |                        |
| 29-3     | MD                                                  | MD | MD | D  | D  | D  | EM | E  | MD |    | saline        |                        |
| 92-2     | MD                                                  | MD | MD | MD | MD | MD | MD | MD | MD | MD | AngII         | MD                     |
| 95-1     | E                                                   | MD | MD | E  | MD | MD | D  | MD | MD |    | AngII         | MD                     |
| 29-1     | E                                                   | E  | E  | E  | E  | MD | D  | E  | MD |    | AngII         |                        |
| 29-2     | MD                                                  | MD | MD | D  | E  | MD | MD | E  | MD |    | AngII         |                        |

D = diestrus

E = estrus

M = metestrus

P = proestrus

Black – mice used for ROS studies

**Suppl. table 2. Estrous Cycle Stages for mice not used for EM experiments**

**PRE AOF TIMEPOINT (~2.7 months old) \***

**Oil – Injected (Control)**

| Animal # | Estrous cycle stage 8-10 days prior to pump implant |    |    |   |   |   |    |    |   |    | Pump contents | terminal estrous stage |
|----------|-----------------------------------------------------|----|----|---|---|---|----|----|---|----|---------------|------------------------|
|          | 1                                                   | 2  | 3  | 4 | 5 | 6 | 7  | 8  | 9 | 10 |               |                        |
| 62-1     | M                                                   | D  | E  |   | M | M | PE | E  | M |    | saline        | E                      |
| 62-2     | M                                                   | M  | PE |   | M | M | M  | E  | M |    | saline        | E                      |
| 62-3     | E                                                   | PE | E  |   | M | M | M  | M  | M |    | saline        | MD                     |
| 70-2     |                                                     |    |    |   |   |   |    |    |   |    | saline        |                        |
| 64-1     | E                                                   | E  | EM |   | M | M | PE | PE | M |    | AngII         | MD                     |
| 64-2     | M                                                   | DE | M  |   | M | M | PE | PE | E |    | AngII         | PE                     |
| 64-3     | M                                                   | M  | P  |   | E | M | M  | PE | E |    | AngII         | E                      |

**VCD - Injected**

| Animal # | Estrous cycle stage 8-10 days prior to pump implant |    |    |    |    |    |    |    |   |    | Pump contents | terminal estrous stage |
|----------|-----------------------------------------------------|----|----|----|----|----|----|----|---|----|---------------|------------------------|
|          | 1                                                   | 2  | 3  | 4  | 5  | 6  | 7  | 8  | 9 | 10 |               |                        |
| 61-1     | PE                                                  | E  | E  |    | M  | D  | PE | E  | M |    | saline        | MD                     |
| 61-3     | E                                                   | M  | D  |    | E  | M  | M  | MD | M |    | saline        | E                      |
| 61-2     | E                                                   | M  | M  |    | M  | M  | M  | M  | D |    | AngII         | E                      |
| 68-1     | MD                                                  | MD | D  | PE | E  | MD | PE | E  |   |    | AngII         | MD                     |
| 68-2     | PE                                                  | E  | EM | MD | MD | MD | E  | E  |   |    | AngII         | E                      |
| 68-3     | PE                                                  | E  | E  | MD | MD | E  | E  | E  |   |    | AngII         |                        |

**PERI AOF TIMEPOINT (~4 months old)**

**Oil – Injected (Control)**

| Animal # | Estrous cycle stage 8-10 days prior to pump implant |    |   |    |    |   |    |    |    |    | Pump contents | terminal estrous stage |
|----------|-----------------------------------------------------|----|---|----|----|---|----|----|----|----|---------------|------------------------|
|          | 1                                                   | 2  | 3 | 4  | 5  | 6 | 7  | 8  | 9  | 10 |               |                        |
| 36-2     | M                                                   | D  | E | M  | E  | E | M  | MD |    |    | saline        | MD                     |
| 38-1     | M                                                   | M  | M | M  | PE | E | M  | M  | PE |    | saline        | E                      |
| 38-2     | M                                                   | E  | M | M  | M  | E | M  | M  | PE |    | saline        | MD                     |
| 985-5    | MD                                                  | MD | D | PE | ED | E | ED | MD | EP |    | AngII         | DP                     |



### VCD - Injected

| Animal # | Estrous cycle stage 8-10 days prior to pump implant |    |    |    |    |    |    |    |   |    | Pump contents | terminal estrous stage |
|----------|-----------------------------------------------------|----|----|----|----|----|----|----|---|----|---------------|------------------------|
|          | 1                                                   | 2  | 3  | 4  | 5  | 6  | 7  | 8  | 9 | 10 |               |                        |
| 30-1     | E                                                   | MD | MD | E  | MD | MD | MD | D  |   |    | saline        | MD                     |
| 38-4     | M                                                   | PE | E  | E  | M  | M  | PE | PE | E |    | AngII         | E                      |
| 43-2     | MD                                                  | PE | E  | MD | MD | MD | MD | PE | E | E  | AngII         | MD                     |

### POST AOF TIMEPOINT (~6 months old)

#### Oil – Injected (Control)

| Animal # | Estrous cycle stage 8-10 days prior to pump implant |    |   |    |    |   |    |    |    |    | Pump contents | terminal estrous stage |
|----------|-----------------------------------------------------|----|---|----|----|---|----|----|----|----|---------------|------------------------|
|          | 1                                                   | 2  | 3 | 4  | 5  | 6 | 7  | 8  | 9  | 10 |               |                        |
| 02-2     | MD                                                  | MD | E | EM | P  | E | E  | MD | MD |    | saline        | MD                     |
| 16-1     | M                                                   | D  | D | D  | E  | E | M  | M  | E  | M  | saline        |                        |
| 16-2     | E                                                   | M  | M | P  | E  |   | M  | PE | E  | M  | saline        |                        |
| 02-1     | MD                                                  | PE | E | MD | MD | D | DP | MD | MD |    | AngII         | MD                     |
| 32-1     | E                                                   | M  | M | M  | M  | E | E  | E  | M  | M  | AngII         | E                      |
| 33-1     | E                                                   | M  | M | PE | M  | M | PE | E  | E  |    | AngII         | E                      |
| 33-2     | EM                                                  | MD | M | PE | M  | M | M  | M  | M  |    | AngII         | MD                     |
| 33-3     | PE                                                  | E  | M | PE | MD | E | E  | M  | M  |    | AngII         | E                      |

#### VCD – Injected

| Animal # | Estrous cycle stage 8-10 days prior to pump implant |    |    |    |    |    |    |    |    |    | Pump contents | terminal estrous stage |
|----------|-----------------------------------------------------|----|----|----|----|----|----|----|----|----|---------------|------------------------|
|          | 1                                                   | 2  | 3  | 4  | 5  | 6  | 7  | 8  | 9  | 10 |               |                        |
| 02-3     | MD                                                  | MD | MD | MD | MD | E  | E  | E  | E  |    | saline        | E                      |
| 17-1     | M                                                   | M  | M  | M  | M  | M  | M  | M  | M  | M  | saline        |                        |
| 17-2     | M                                                   | M  | M  | M  | M  | M  | M  | M  | M  | E  | saline        |                        |
| 17-3     | E                                                   | M  | M  | M  | M  | M  | M  | E  | E  | M  | saline        |                        |
| 29-3     | MD                                                  | MD | MD | D  | D  | D  | EM | E  | MD |    | saline        |                        |
| 92-2     | MD                                                  | MD | MD | MD | MD | MD | MD | MD | MD | MD | AngII         | MD                     |
| 95-1     | E                                                   | MD | MD | E  | MD | MD | D  | MD | MD |    | AngII         | MD                     |
| 29-1     | E                                                   | E  | E  | E  | E  | MD | D  | E  | MD |    | AngII         |                        |
| 29-2     | MD                                                  | MD | MD | D  | E  | MD | MD | E  | MD |    | AngII         |                        |

D = diestrus

E = estrus

M = metestrus

P = proestrus

Black – mice used for ROS studies

**Suppl. table 1. Estrous Cycle Stages for electron microscopy experiments**

**PRE AOF TIMEPOINT (~2.7 months old)** (tissue banked for future experiments)

**Oil – Injected (Control)**

| Animal # | Estrous cycle stage 8-10 days prior to pump implant |    |    |    |    |    |    |    |    |    | Pump contents | terminal estrous stage |
|----------|-----------------------------------------------------|----|----|----|----|----|----|----|----|----|---------------|------------------------|
|          | 1                                                   | 2  | 3  | 4  | 5  | 6  | 7  | 8  | 9  | 10 |               |                        |
| 994-1    | M                                                   | MD | D  | DP | MD | E  | E  | E  | MD |    | saline        | M                      |
| 600-2    |                                                     | MD | M  | MD | PE | E  | EM | MD | MD |    | saline        | MD                     |
| 932-1    | E                                                   | MD | M  |    | PE | E  | E  | M  | M  | M  | saline        | MD                     |
| 994-2    | MD                                                  | PE | PE | E  | MD | PE | E  | E  | MD |    | AngII         | D                      |
| 600-1    |                                                     | MD | PE | E  | MD | MD | D  | MD | PE |    | AngII         | MD                     |
| 932-2    | E                                                   | M  | M  |    | M  | PE | E  | E  | M  | MD | AngII         | MD                     |

**VCD - Injected**

| Animal # | Estrous cycle stage 8-10 days prior to pump implant |    |    |    |    |     |    |    |    |    | Pump contents | terminal estrous stage |
|----------|-----------------------------------------------------|----|----|----|----|-----|----|----|----|----|---------------|------------------------|
|          | 1                                                   | 2  | 3  | 4  | 5  | 6   | 7  | 8  | 9  | 10 |               |                        |
| 985-2    | MD                                                  | MD | MD | PE | E  | D   | PE | EM | PE |    | saline        | P                      |
| 600-3    |                                                     | PE | PE | E  | EM | MD1 | D  | MD | D  |    | saline        | MD                     |
| 932-4    | E                                                   | M  | M  |    | PE | E   | E  | E  | M  | MD | saline        | MD                     |
| 985-3    | MD                                                  | DP | PE | MD | E  | E   | E  | MD | MD |    | AngII         | E                      |
| 985-4    | MD                                                  | E  | E  | E  | PE | MD  | MD | MD | MD |    | AngII         | E                      |
| 932-5    | E                                                   | M  | M  |    | PE | E   | E  | M  | M  | PE | AngII         | PE                     |

**PERI AOF TIMEPOINT (~4 months old)**

**Oil – Injected (Control)**

| Animal # | Estrous cycle stage 8-10 days prior to pump implant |    |    |    |    |    |    |    |    |    | Pump contents | terminal estrous stage |
|----------|-----------------------------------------------------|----|----|----|----|----|----|----|----|----|---------------|------------------------|
|          | 1                                                   | 2  | 3  | 4  | 5  | 6  | 7  | 8  | 9  | 10 |               |                        |
| 990 1    | E                                                   | MD | D  | D  | PE | D  | E  | MD | MD | PE | saline        | PE                     |
| 09 2     | D                                                   | P  | E  | EM | MD | P  | E  | EM | MD |    | saline        | MD                     |
| 36 1     | M                                                   | D  | PE | M  | E  | MD | PE | E  |    |    | saline        | MD                     |
| 34 1     | E                                                   | EM | MD | D  |    | MD | MD | P  | PE |    | AngII         | P                      |
| 30 3     | MD                                                  | PE | E  | EM | MD | EP | E  | E  |    |    | AngII         | E                      |
| 943 1    | E                                                   | E  | E  | MD | MD | PE | E  | E  | MD | MD | AngII         | PE                     |

### VCD - Injected

| Animal # | Estrous cycle stage 8-10 days prior to pump implant |    |    |    |    |    |    |    |    |    | Pump contents | terminal estrous stage |
|----------|-----------------------------------------------------|----|----|----|----|----|----|----|----|----|---------------|------------------------|
|          | 1                                                   | 2  | 3  | 4  | 5  | 6  | 7  | 8  | 9  | 10 |               |                        |
| 09 4     | MD                                                  | MD | PE | E  | E  | MD | P  | E  | E  |    | saline        | E                      |
| 34 3     | EM                                                  | E  | MD | MD | MD | E  | MD | MD | PE |    | saline        | MD                     |
| 36 4     | E                                                   | M  | P  | E  | M  | M  | E  | M  |    |    | saline        | E                      |
| 34 4     | MD                                                  | E  | E  | E  | MD | MD | MD | PE | E  |    | AngII         | E                      |
| 36 3     | D                                                   | M  | PE | E  | D  | P  | M  | E  |    |    | AngII         | MD                     |
| 36 5     |                                                     | M  | D  | D  | M  | PE | E  | E  |    |    | AngII         | E                      |

### POST AOF TIMEPOINT (~6 months old)

#### Oil – Injected (Control)

| Animal # | Estrous cycle stage 8-10 days prior to pump implant |    |    |    |    |    |    |    |    |    | Pump contents | terminal estrous stage |
|----------|-----------------------------------------------------|----|----|----|----|----|----|----|----|----|---------------|------------------------|
|          | 1                                                   | 2  | 3  | 4  | 5  | 6  | 7  | 8  | 9  | 10 |               |                        |
| 85 2     | E                                                   | EM | MD | MD | MD | D  | E  | D  | D  |    | saline        | D                      |
| 79 3     | PE                                                  | MD | MD | MD | E  | D  | MD | PE | E  |    | saline        | E                      |
| 40 1     | MD                                                  | MD | PE | PE | E  | EM | P  | MD | MD | D  | saline        | D                      |
| 04 2     | MD                                                  | PE | E  | MD | P  | E  | MD | D  | PE |    | AngII         | PE                     |
| 04 3     | D                                                   | PE | E  | MD | D  | D  | MD | MD | PE |    | AngII         | PE                     |
| 85 1     | E                                                   | MD | MD | PE | E  | PE | E  | MD | MD |    | AngII         | MD                     |

#### VCD – Injected

| Animal # | Estrous cycle stage 8-10 days prior to pump implant |    |    |    |    |    |    |    |    |    | Pump contents | terminal estrous stage |
|----------|-----------------------------------------------------|----|----|----|----|----|----|----|----|----|---------------|------------------------|
|          | 1                                                   | 2  | 3  | 4  | 5  | 6  | 7  | 8  | 9  | 10 |               |                        |
| 95 2     | MD                                                  | MD | MD | MD | MD | MD | MD | MD | MD |    | saline        | MD                     |
| 40 3     | MD                                                  | MD | MD | MD | MD | MD | MD | MD | MD | MD | saline        | MD                     |
| 53 2     | MD                                                  | MD | PE | E  | MD | MD | MD | E  | MD | MD | saline        | MD                     |
| 02 4     | MD                                                  | MD | MD | MD | MD | MD | MD | MD | MD |    | AngII         | MD                     |
| 79 2     | MD                                                  | MD | MD | MD | MD | MD | MD | MD | MD |    | AngII         | MD                     |
| 50 2     | E                                                   | M  | E  | M  | E  | M  | M  | M  | M  |    | AngII         | E                      |

D = diestrus  
 E = estrus  
 M = metestrus  
 P = proestrus
